# Supplementary material for: Conditional protein tagging methods reveal highly specific subcellular distribution of ion channels in motion-sensing neurons
Source: eLife. 2020 Oct 20;9:e62953. doi: 10.7554/eLife.62953 (PMC7655108; doi:10.7554/eLife.62953)
Supplement: Figure 2—source data 1. [file elife-62953-fig2-data1.xlsx]

## Sheet: Sheet1
Figure 2F - source data 1. Number of GluClalpha puncta quantified for T4 dendrites.
Name	Cell	Receptor	Sub-type	# of puncta	Size filter (voxels)	Threshold
T4ab_c1	T4	GluCl	ab	18	10-2852080	40
T4ab_c2	T4	GluCl	ab	21	10-5375202	30
T4ab_c3	T4	GluCl	ab	23	10-2514600	40
T4ab_c4	T4	GluCl	ab	30	10-2870250	35
T4ab_c5	T4	GluCl	ab	16	10-2280720	40
T4cd_c1	T4	GluCl	cd	14	10-6078180	30
T4cd_c2	T4	GluCl	cd	19	10-3885728	25
T4cd_c3	T4	GluCl	cd	23	10_5039584	40		mean = 20.5 ± 4.98 [n = 8])
