# Supplementary material for: Conditional protein tagging methods reveal highly specific subcellular distribution of ion channels in motion-sensing neurons
Source: eLife. 2020 Oct 20;9:e62953. doi: 10.7554/eLife.62953 (PMC7655108; doi:10.7554/eLife.62953)
Supplement: Figure 3—source data 1. [file elife-62953-fig3-data1.xlsx]

## Sheet: Sheet1
Figure 4E - source data 1. Number of Rdl puncta quantified for T4/T5 dendrites.
T4ab_c1	T4	RDL	ab	32	10_3722004	40
T4ab_c2	T4	RDL	ab	33	10_2406768	52
T4ab_c3	T4	RDL	ab	31	10_4174100	47
T4ab_c4	T4	RDL	ab	21	10_7267000	40
T4ab_c5	T4	RDL	ab	44	10_7567560	45
T4ab_c6	T4	RDL	ab	35	10_3162276	35
T4cd_c1	T4	RDL	cd	66	10_1869450	40
T4cd_c2	T4	RDL	cd	38	10_3576960	25
T4cd_c3	T4	RDL	cd	25	10_4459680	45
T4cd_c4	T4	RDL	cd	55	10_5780880	55
T4cd_c5	T4	RDL	cd	50	10_2672835	70
T4cd_c6	T4	RDL	cd	54	10_2297107	60
T4cd_c7	T4	RDL	cd	45	10_5991408	25
T4cd_c8	T4	RDL	cd	41	10_2486760	30
T4cd_c9	T4	RDL	cd	40	10_3366306	40
T4cd_c10	T4	RDL	cd	32	10_2901640	50
T4cd_c11	T4	RDL	cd	29	10_2904606	40
T4cd_c12	T4	RDL	cd	57	10_3478761	45		mean = 40.4 ± 12.17 [n = 18]
T5ab_c1	T5	RDL	ab	47	10_4019716	38
T5ab_c2	T5	RDL	ab	48	10_4609220	35
T5cd_c1	T5	RDL	cd	43	10_7282035	45
T5cd_c2	T5	RDL	cd	53	10_3565575	30
T5cd_c3	T5	RDL	cd	32	10_1641640	55
T5cd_c4	T5	RDL	cd	39	10_5710500	50
T5cd_c5	T5	RDL	cd	44	10_3126960	45
T5cd_c6	T5	RDL	cd	49	10_2807515	40
T5cd_c7	T5	RDL	cd	23	10_1786400	40
T5cd_c8	T5	RDL	cd	44	10_3646006	45		mean = 42.2 ± 8.88 [n = 10]
