# Supplementary material for: Conditional protein tagging methods reveal highly specific subcellular distribution of ion channels in motion-sensing neurons
Source: eLife. 2020 Oct 20;9:e62953. doi: 10.7554/eLife.62953 (PMC7655108; doi:10.7554/eLife.62953)
Supplement: Figure 4—source data 1. [file elife-62953-fig4-data1.xlsx]

## Sheet: Sheet1
Figure 5E - source data 1. Number of Dalpha7 puncta quantified for T4/T5 dendrites.
T4ab_c1	T4	Da7	ab	63	10-3295284	50
T4cd_c2	T4	Da7	cd	117	10-3139500	35
T4cd_c3	T4	Da7	cd	101	10-4719000	50
T4cd_c4	T4	Da7	cd	95	10-6523059	45
T4cd_c5	T4	Da7	cd	102	10-5479212	50
T4cd_c6	T4	Da7	cd	72	10-2189592	70		mean = 91.6 ± 20.27 [n = 6]
T5ab_c1	T5	Da7	ab	86	10-2063292	50
T5cd_c1	T5	Da7	cd	134	10-2752344	30
T5cd_c2	T5	Da7	cd	90	10-2625021	35
T5cd_c3	T5	Da7	cd	126	10-2886128	35
T5cd_c4	T5	Da7	cd	117	10-4275738	40		mean = 110.6 ± 21.53 [n = 5]
