# Supplementary material for: Conditional protein tagging methods reveal highly specific subcellular distribution of ion channels in motion-sensing neurons
Source: eLife. 2020 Oct 20;9:e62953. doi: 10.7554/eLife.62953 (PMC7655108; doi:10.7554/eLife.62953)
Supplement: Supplementary file 4. [file elife-62953-supp4.gbk]

LOCUS       Exported                4107 bp ds-DNA     circular SYN 04-JUN-2020
DEFINITION  .
ACCESSION   .
VERSION     .
KEYWORDS    .
SOURCE      synthetic DNA construct
  ORGANISM  synthetic DNA construct
REFERENCE   1  (bases 1 to 4107)
  AUTHORS   rvieira
  TITLE     Direct Submission
  JOURNAL   Exported Thursday, Jun 4, 2020 from SnapGene 5.1.3
            https://www.snapgene.com
FEATURES             Location/Qualifiers
     source          1..4107
                     /organism="synthetic DNA construct"
                     /mol_type="other DNA"
                     /note="color: #ffffff"
     promoter        96..200
                     /label=KanR promoter
                     /note="color: #ffffff; direction: RIGHT"
     CDS             201..1016
                     /codon_start=1
                     /label=KanR
                     /note="color: #ccffcc"
                     /translation="MSHIQRETSCSRPRLNSNMDADLYGYKWARDNVGQSGATIYRLYG
                     KPDAPELFLKHGKGSVANDVTDEMVRLNWLTEFMPLPTIKHFIRTPDDAWLLTTAIPGK
                     TAFQVLEEYPDSGENIVDALAVFLRRLHSIPVCNCPFNSDRVFRLAQAQSRMNNGLVDA
                     SDFDDERNGWPVEQVWKEMHKLLPFSPDSVVTHGDFSLDNLIFDEGKLIGCIDVGRVGI
                     ADRYQDLAILWNCLGEFSPSLQKRLFQKYGIDNPDMNKLQFHLMLDEFF"
     rep_origin      1187..1775
                     /direction=RIGHT
                     /label=ori
                     /note="color: #ffff00"
     primer_bind     2114..2133
                     /label=pUC57 fwd1
                     /note="color: black; sequence: tccggctcgtatgttgtgtg"
     primer_bind     2161..2178
                     /label=M13 Fw
                     /note="color: black; sequence: caggaaacagctatgacc"
     misc_feature    2223..2322
                     /label=attB
                     /note="attB"
                     /note="color: #999999"
     misc_feature    2333..2366
                     /label=FRT 14
                     /note="FRT14"
                     /note="color: #ff9900; direction: RIGHT"
     misc_feature    2417..2450
                     /label=FRT
                     /note="FRT"
                     /note="color: #ffff99; direction: RIGHT"
     misc_feature    2549..2578
                     /label=SD
                     /note="Predicted by www.fruitfly.org"
                     /note="color: #00ccff"
     CDS             complement(2595..3314)
                     /codon_start=1
                     /product="GFP"
                     /label=GFP
                     /label=EGFP
                     /note="color: #00ff00"
                     /translation="GSVSKGEELFTGVVPILVELDGDVNGHKFSVRGEGEGDATNGKLT
                     LKFICTTGKLPVPWPTLVTTLTYGVQCFSRYPDHMKQHDFFKSAMPEGYVQERTISFKD
                     DGTYKTRAEVKFEGDTLVNRIELKGIDFKEDGNILGHKLEYNFNSHNVYITADKQKNGI
                     KANFKIRHNVEDGSVQLADHYQQNTPIGDGPVLLPDNHYLSTQSVLSKDPNEKRDHMVL
                     LEFVTAAGITLGMDELYK"
     misc_feature    3336..3376
                     /label=SA
                     /note="predicted using www.fruitfly.org"
                     /note="color: #00ccff"
     misc_feature    complement(3456..3489)
                     /label=FRT14
                     /note="FRT14 "
                     /note="color: #ff9900; direction: LEFT"
     misc_feature    complement(3540..3573)
                     /label=FRT
                     /note="FRT"
                     /note="color: #ffff99; direction: LEFT"
     misc_feature    3582..3681
                     /label=attB
                     /note="attB "
                     /note="color: #999999"
     primer_bind     complement(3713..3730)
                     /label=M13 rv
                     /note="color: black; sequence: tgtaaaacgacggccagt"
ORIGIN
        1 gacgaaaggg cctcgtgata cgcctatttt tataggttaa tgtcatgata ataatggttt
       61 cttagacgtc aggtggcact tttcggggaa atgtgcgcgg aacccctatt tgtttatttt
      121 tctaaataca ttcaaatatg tatccgctca tgagacaata accctgataa atgcttcaat
      181 aatattgaaa aaggaagagt atgagccata ttcaacggga aacgtcttgc tctaggccgc
      241 gattaaattc caacatggat gctgatttat atgggtataa atgggctcgc gataatgtcg
      301 ggcaatcagg tgcgacaatc tatcgattgt atgggaagcc cgatgcgcca gagttgtttc
      361 tgaaacatgg caaaggtagc gttgccaatg atgttacaga tgagatggtc agactaaact
      421 ggctgacgga atttatgcct cttccgacca tcaagcattt tatccgtact cctgatgatg
      481 catggttact caccactgcg atccctggga aaacagcatt ccaggtatta gaagaatatc
      541 ctgattcagg tgaaaatatt gttgatgcgc tggcagtgtt cctgcgccgg ttgcattcga
      601 ttcctgtttg taattgtcct tttaacagcg atcgcgtatt tcgtctcgct caggcgcaat
      661 cacgaatgaa taacggtttg gttgatgcga gtgattttga tgacgagcgt aatggctggc
      721 ctgttgaaca agtctggaaa gaaatgcata aacttttgcc attctcaccg gattcagtcg
      781 tcactcatgg tgatttctca cttgataacc ttatttttga cgaggggaaa ttaataggtt
      841 gtattgatgt tggacgagtc ggaatcgcag accgatacca ggatcttgcc atcctatgga
      901 actgcctcgg tgagttttct ccttcattac agaaacggct ttttcaaaaa tatggtattg
      961 ataatcctga tatgaataaa ttgcagtttc atttgatgct cgatgagttt ttctaactgt
     1021 cagaccaagt ttactcatat atactttaga ttgatttaaa acttcatttt taatttaaaa
     1081 ggatctaggt gaagatcctt tttgataatc tcatgaccaa aatcccttaa cgtgagtttt
     1141 cgttccactg agcgtcagac cccgtagaaa agatcaaagg atcttcttga gatccttttt
     1201 ttctgcgcgt aatctgctgc ttgcaaacaa aaaaaccacc gctaccagcg gtggtttgtt
     1261 tgccggatca agagctacca actctttttc cgaaggtaac tggcttcagc agagcgcaga
     1321 taccaaatac tgttcttcta gtgtagccgt agttaggcca ccacttcaag aactctgtag
     1381 caccgcctac atacctcgct ctgctaatcc tgttaccagt ggctgctgcc agtggcgata
     1441 agtcgtgtct taccgggttg gactcaagac gatagttacc ggataaggcg cagcggtcgg
     1501 gctgaacggg gggttcgtgc acacagccca gcttggagcg aacgacctac accgaactga
     1561 gatacctaca gcgtgagcta tgagaaagcg ccacgcttcc cgaagggaga aaggcggaca
     1621 ggtatccggt aagcggcagg gtcggaacag gagagcgcac gagggagctt ccagggggaa
     1681 acgcctggta tctttatagt cctgtcgggt ttcgccacct ctgacttgag cgtcgatttt
     1741 tgtgatgctc gtcagggggg cggagcctat ggaaaaacgc cagcaacgcg gcctttttac
     1801 ggttcctggc cttttgctgg ccttttgctc acatgttctt tcctgcgtta tcccctgatt
     1861 ctgtggataa ccgtattacc gcctttgagt gagctgatac cgctcgccgc agccgaacga
     1921 ccgagcgcag cgagtcagtg agcgaggaag cggaagagcg cccaatacgc aaaccgcctc
     1981 tccccgcgcg ttggccgatt cattaatgca gctggcacga caggtttccc gactggaaag
     2041 cgggcagtga gcgcaacgca attaatgtga gttagctcac tcattaggca ccccaggctt
     2101 tacactttat gcttccggct cgtatgttgt gtggaattgt gagcggataa caatttcaca
     2161 caggaaacag ctatgaccat gctcgagcca agctcggcgc gccattggga tgaaccgagc
     2221 tcgatgtagg tcacggtctc gaagccgcgg tgcgggtgcc agggcgtgcc cttgggctcc
     2281 ccgggcgcgt actccacctc acccatctgg tccatcatga tggaagactt ctgaagttcc
     2341 tattctatca gaagtatagg aacttcgcag aatggtagct ggattgtagc tgctattagc
     2401 aatatgaaac ctcttagaag ttcctattct ctagaaagta taggaacttc gaattctggc
     2461 gacttgtcgc atctttctct gagtgggtaa ggtcattgtg gggtcttaag ggctaaaggg
     2521 tagtgatgat gaaggcattt gatgccattg ttcaataact tacctccgga acctccgctt
     2581 ccaccgctac ctcccttgta cagctcatcc atgcccaggg tgatgccggc ggcggtcacg
     2641 aactccagca gcaccatgtg atcgcgcttc tcgttggggt ccttggacag cacgctctgg
     2701 gtgctcaggt agtggttatc gggcagcagc actgggccgt cgccgatggg ggtgttctgc
     2761 tggtagtgat cggccagctg cacggagcca tcctccacat tgtggcggat cttgaagttg
     2821 gccttgatgc cgttcttctg cttatcggcg gtgatgtaca cgttgtggct gttgaagttg
     2881 tactccagct tgtggcccag gatgttgcca tcctccttga aatcgatgcc cttcagctcg
     2941 atgcggttca ccagggtatc gccctcgaac ttcacctcgg cgcgggtctt gtaggtgccg
     3001 tcatccttga agctgatggt gcgctcctgc acgtagccct cgggcatggc gctcttgaag
     3061 aaatcgtgct gcttcatgtg atcggggtag cggctgaagc actgcacgcc gtaggtcagg
     3121 gtggtcacca gggtgggcca gggcacgggc agcttgccgg tggtgcagat gaacttcagg
     3181 gtcagcttgc cgttggtggc gtcgccctcg ccctcgccgc gcacgctgaa cttgtggccg
     3241 ttcacgtcgc catccagctc caccaggatg ggcaccacgc cggtgaacag ctcctcgccc
     3301 ttggacacgg atccggatcc gccgctacct ccgcttccac cggaacctcc gccacctgcg
     3361 gaagagagat aaatcggttg attaaaatta gttcaagaat aattagtata tttaaacatg
     3421 ccggggatgg gacaagtcgc catgttggat cgactgaagt tcctatactt ctgatagaat
     3481 aggaacttct tgccttaacc cagaaattat cactgttatt ctttagaatg gtgcaaagag
     3541 aagttcctat actttctaga gaataggaac ttcccgtctt ccatcatgat ggaccagatg
     3601 ggtgaggtgg agtacgcgcc cggggagccc aagggcacgc cctggcaccc gcaccgcggc
     3661 ttcgagaccg tgacctacat caagcttgtt ccatcccaat acgcgtcaat tcactggccg
     3721 tcgttttaca acgtcgtgac tgggaaaacc ctggcgttac ccaacttaat cgccttgcag
     3781 cacatccccc tttcgccagc tggcgtaata gcgaagaggc ccgcaccgat cgcccttccc
     3841 aacagttgcg cagcctgaat ggcgaatggc gcctgatgcg gtattttctc cttacgcatc
     3901 tgtgcggtat ttcacaccgc atatggtgca ctctcagtac aatctgctct gatgccgcat
     3961 agttaagcca gccccgacac ccgccaacac ccgctgacgc gccctgacgg gcttgtctgc
     4021 tcccggcatc cgcttacaga caagctgtga ccgtctccgg gagctgcatg tgtcagaggt
     4081 tttcaccgtc atcaccgaaa cgcgcga
//
